# Supplementary material
Source: publisher site journal article supplement (https://www.spandidos-publications.com/7749/downloadSupplementary)
Supplement: Supplementary file 1 [file downloadSupplementary]

## Sheet: Sheet1
Table SIII. Potential relationships between immune cells and IVDD.
id.exposure	id.outcome	outcome	exposure	method	nsnp	b	se	pval	lo_ci	up_ci	or	or_lci95	or_uci95
GCST90001391	finngen_R5_M13_LOWBACKPAINORANDSCIATICA	IVDD	IgD+ %B cell	MR Egger	16	0.318905	0.165517	0.0745613	-0.00550955	0.643319	1.37562	0.994506	1.90279
GCST90001391	finngen_R5_M13_LOWBACKPAINORANDSCIATICA	IVDD	IgD+ %B cell	Weighted median	16	0.137871	0.163288	0.398477	-0.182173	0.457915	1.14783	0.833457	1.58077
GCST90001391	finngen_R5_M13_LOWBACKPAINORANDSCIATICA	IVDD	IgD+ %B cell	Inverse variance weighted	16	0.231097	0.104674	0.0272593	0.0259365	0.436257	1.25998	1.02628	1.54691
GCST90001391	finngen_R5_M13_LOWBACKPAINORANDSCIATICA	IVDD	IgD+ %B cell	Simple mode	16	-0.0483366	0.267994	0.85928	-0.573604	0.476931	0.952813	0.563491	1.61112
GCST90001391	finngen_R5_M13_LOWBACKPAINORANDSCIATICA	IVDD	IgD+ %B cell	Weighted mode	16	-0.0315785	0.207927	0.881311	-0.439115	0.375958	0.968915	0.644607	1.45639
GCST90001397	finngen_R5_M13_LOWBACKPAINORANDSCIATICA	IVDD	Unsw mem %B cell	MR Egger	30	-0.149637	0.0819621	0.0785822	-0.310282	0.0110092	0.861021	0.73324	1.01107
GCST90001397	finngen_R5_M13_LOWBACKPAINORANDSCIATICA	IVDD	Unsw mem %B cell	Weighted median	30	-0.196233	0.0877165	0.0252781	-0.368157	-0.0243086	0.821821	0.692008	0.975984
GCST90001397	finngen_R5_M13_LOWBACKPAINORANDSCIATICA	IVDD	Unsw mem %B cell	Inverse variance weighted	30	-0.1673	0.0597925	0.00514169	-0.284494	-0.0501073	0.845945	0.752395	0.951127
GCST90001397	finngen_R5_M13_LOWBACKPAINORANDSCIATICA	IVDD	Unsw mem %B cell	Simple mode	30	0.0434839	0.152	0.776853	-0.254437	0.341405	1.04444	0.775353	1.40692
GCST90001397	finngen_R5_M13_LOWBACKPAINORANDSCIATICA	IVDD	Unsw mem %B cell	Weighted mode	30	-0.122086	0.0802004	0.138775	-0.279279	0.0351069	0.885072	0.756329	1.03573
GCST90001402	finngen_R5_M13_LOWBACKPAINORANDSCIATICA	IVDD	Sw mem %B cell	MR Egger	13	-0.291562	0.189104	0.151382	-0.662205	0.0790818	0.747096	0.515713	1.08229
GCST90001402	finngen_R5_M13_LOWBACKPAINORANDSCIATICA	IVDD	Sw mem %B cell	Weighted median	13	-0.211399	0.187709	0.260077	-0.579308	0.15651	0.809451	0.560286	1.16942
GCST90001402	finngen_R5_M13_LOWBACKPAINORANDSCIATICA	IVDD	Sw mem %B cell	Inverse variance weighted	13	-0.240775	0.117441	0.0403472	-0.470961	-0.0105904	0.786018	0.624402	0.989465
GCST90001402	finngen_R5_M13_LOWBACKPAINORANDSCIATICA	IVDD	Sw mem %B cell	Simple mode	13	-0.371349	0.307556	0.250531	-0.974159	0.231461	0.689803	0.37751	1.26044
GCST90001402	finngen_R5_M13_LOWBACKPAINORANDSCIATICA	IVDD	Sw mem %B cell	Weighted mode	13	-0.259871	0.262443	0.341623	-0.774259	0.254517	0.771151	0.461045	1.28984
GCST90001409	finngen_R5_M13_LOWBACKPAINORANDSCIATICA	IVDD	Naive-mature B cell AC	MR Egger	21	-0.178815	0.078159	0.0337839	-0.332006	-0.0256229	0.836261	0.717483	0.974703
GCST90001409	finngen_R5_M13_LOWBACKPAINORANDSCIATICA	IVDD	Naive-mature B cell AC	Weighted median	21	-0.166759	0.0960376	0.082495	-0.354992	0.021475	0.846404	0.701179	1.02171
GCST90001409	finngen_R5_M13_LOWBACKPAINORANDSCIATICA	IVDD	Naive-mature B cell AC	Inverse variance weighted	21	-0.152242	0.0639279	0.0172438	-0.277541	-0.0269435	0.85878	0.757645	0.973416
GCST90001409	finngen_R5_M13_LOWBACKPAINORANDSCIATICA	IVDD	Naive-mature B cell AC	Simple mode	21	0.239831	0.183296	0.205564	-0.11943	0.599091	1.27103	0.887426	1.82046
GCST90001409	finngen_R5_M13_LOWBACKPAINORANDSCIATICA	IVDD	Naive-mature B cell AC	Weighted mode	21	-0.183719	0.0869596	0.0473977	-0.354159	-0.0132777	0.83217	0.701763	0.98681
GCST90001556	finngen_R5_M13_LOWBACKPAINORANDSCIATICA	IVDD	EM CD8br %T cell	MR Egger	14	0.104701	0.0812449	0.221789	-0.0545387	0.263941	1.11038	0.946922	1.30205
GCST90001556	finngen_R5_M13_LOWBACKPAINORANDSCIATICA	IVDD	EM CD8br %T cell	Weighted median	14	0.141675	0.0862524	0.100473	-0.0273796	0.31073	1.1522	0.972992	1.36442
GCST90001556	finngen_R5_M13_LOWBACKPAINORANDSCIATICA	IVDD	EM CD8br %T cell	Inverse variance weighted	14	0.152199	0.0655102	0.0201637	0.0237991	0.280599	1.16439	1.02408	1.32392
GCST90001556	finngen_R5_M13_LOWBACKPAINORANDSCIATICA	IVDD	EM CD8br %T cell	Simple mode	14	0.175229	0.118388	0.162664	-0.0568117	0.40727	1.19152	0.944772	1.50271
GCST90001556	finngen_R5_M13_LOWBACKPAINORANDSCIATICA	IVDD	EM CD8br %T cell	Weighted mode	14	0.123427	0.0771131	0.133476	-0.0277145	0.274569	1.13137	0.972666	1.31596
GCST90001594	finngen_R5_M13_LOWBACKPAINORANDSCIATICA	IVDD	DP (CD4+CD8+) AC	MR Egger	18	-0.518776	0.222537	0.033145	-0.954948	-0.082604	0.595249	0.384832	0.920716
GCST90001594	finngen_R5_M13_LOWBACKPAINORANDSCIATICA	IVDD	DP (CD4+CD8+) AC	Weighted median	18	-0.25467	0.172294	0.139377	-0.592366	0.083026	0.775172	0.553017	1.08657
GCST90001594	finngen_R5_M13_LOWBACKPAINORANDSCIATICA	IVDD	DP (CD4+CD8+) AC	Inverse variance weighted	18	-0.293017	0.120305	0.0148667	-0.528816	-0.0572184	0.746009	0.589302	0.944388
GCST90001594	finngen_R5_M13_LOWBACKPAINORANDSCIATICA	IVDD	DP (CD4+CD8+) AC	Simple mode	18	-0.339363	0.273677	0.231814	-0.87577	0.197044	0.712224	0.416541	1.2178
GCST90001594	finngen_R5_M13_LOWBACKPAINORANDSCIATICA	IVDD	DP (CD4+CD8+) AC	Weighted mode	18	-0.231233	0.194977	0.251953	-0.613388	0.150922	0.793554	0.541513	1.16291
GCST90001614	finngen_R5_M13_LOWBACKPAINORANDSCIATICA	IVDD	CD8br and CD8dim %leukocyte	MR Egger	14	0.0236498	0.424217	0.956459	-0.807816	0.855116	1.02393	0.445831	2.35165
GCST90001614	finngen_R5_M13_LOWBACKPAINORANDSCIATICA	IVDD	CD8br and CD8dim %leukocyte	Weighted median	14	0.330781	0.217984	0.129152	-0.0964675	0.75803	1.39206	0.908039	2.13407
GCST90001614	finngen_R5_M13_LOWBACKPAINORANDSCIATICA	IVDD	CD8br and CD8dim %leukocyte	Inverse variance weighted	14	0.354526	0.159563	0.0262928	0.041783	0.667268	1.4255	1.04267	1.94891
GCST90001614	finngen_R5_M13_LOWBACKPAINORANDSCIATICA	IVDD	CD8br and CD8dim %leukocyte	Simple mode	14	0.290756	0.30668	0.360382	-0.310337	0.89185	1.33744	0.7332	2.43964
GCST90001614	finngen_R5_M13_LOWBACKPAINORANDSCIATICA	IVDD	CD8br and CD8dim %leukocyte	Weighted mode	14	0.30956	0.29491	0.31299	-0.268464	0.887583	1.36282	0.764553	2.42925
GCST90001639	finngen_R5_M13_LOWBACKPAINORANDSCIATICA	IVDD	CD3- lymphocyte AC	MR Egger	16	-0.158436	0.247	0.531598	-0.642555	0.325684	0.853478	0.525947	1.38498
GCST90001639	finngen_R5_M13_LOWBACKPAINORANDSCIATICA	IVDD	CD3- lymphocyte AC	Weighted median	16	-0.300853	0.178705	0.092275	-0.651114	0.0494088	0.740187	0.521464	1.05065
GCST90001639	finngen_R5_M13_LOWBACKPAINORANDSCIATICA	IVDD	CD3- lymphocyte AC	Inverse variance weighted	16	-0.25468	0.124283	0.0404438	-0.498276	-0.0110846	0.775164	0.607577	0.988977
GCST90001639	finngen_R5_M13_LOWBACKPAINORANDSCIATICA	IVDD	CD3- lymphocyte AC	Simple mode	16	-0.118418	0.29874	0.697398	-0.703949	0.467113	0.888324	0.494628	1.59538
GCST90001639	finngen_R5_M13_LOWBACKPAINORANDSCIATICA	IVDD	CD3- lymphocyte AC	Weighted mode	16	-0.292719	0.262825	0.28292	-0.807856	0.222418	0.746232	0.445813	1.24909
GCST90001649	finngen_R5_M13_LOWBACKPAINORANDSCIATICA	IVDD	HLA DR+ NK %NK	MR Egger	23	0.136535	0.136021	0.326912	-0.130066	0.403136	1.1463	0.878037	1.49651
GCST90001649	finngen_R5_M13_LOWBACKPAINORANDSCIATICA	IVDD	HLA DR+ NK %NK	Weighted median	23	0.117734	0.119493	0.324487	-0.116473	0.35194	1.12494	0.890055	1.42182
GCST90001649	finngen_R5_M13_LOWBACKPAINORANDSCIATICA	IVDD	HLA DR+ NK %NK	Inverse variance weighted	23	0.188094	0.0826004	0.0227771	0.0261969	0.34999	1.20695	1.02654	1.41905
GCST90001649	finngen_R5_M13_LOWBACKPAINORANDSCIATICA	IVDD	HLA DR+ NK %NK	Simple mode	23	0.00768493	0.209662	0.971092	-0.403253	0.418622	1.00771	0.668143	1.51987
GCST90001649	finngen_R5_M13_LOWBACKPAINORANDSCIATICA	IVDD	HLA DR+ NK %NK	Weighted mode	23	0.0993019	0.124088	0.432119	-0.14391	0.342514	1.1044	0.865966	1.40848
GCST90001650	finngen_R5_M13_LOWBACKPAINORANDSCIATICA	IVDD	HLA DR+ NK %CD3- lymphocyte	MR Egger	22	0.191855	0.13371	0.16678	-0.0702164	0.453927	1.2115	0.932192	1.57448
GCST90001650	finngen_R5_M13_LOWBACKPAINORANDSCIATICA	IVDD	HLA DR+ NK %CD3- lymphocyte	Weighted median	22	0.116389	0.117849	0.323341	-0.114594	0.347373	1.12343	0.891728	1.41534
GCST90001650	finngen_R5_M13_LOWBACKPAINORANDSCIATICA	IVDD	HLA DR+ NK %CD3- lymphocyte	Inverse variance weighted	22	0.254226	0.0847755	0.00271032	0.088066	0.420386	1.28946	1.09206	1.52255
GCST90001650	finngen_R5_M13_LOWBACKPAINORANDSCIATICA	IVDD	HLA DR+ NK %CD3- lymphocyte	Simple mode	22	0.497763	0.228087	0.0405859	0.0507131	0.944812	1.64504	1.05202	2.57233
GCST90001650	finngen_R5_M13_LOWBACKPAINORANDSCIATICA	IVDD	HLA DR+ NK %CD3- lymphocyte	Weighted mode	22	0.109287	0.116566	0.359134	-0.119183	0.337757	1.11548	0.887645	1.4018
GCST90001659	finngen_R5_M13_LOWBACKPAINORANDSCIATICA	IVDD	CD39+ CD4+ %CD4+	MR Egger	25	-0.170521	0.0707644	0.0243659	-0.30922	-0.0318231	0.843225	0.734019	0.968678
GCST90001659	finngen_R5_M13_LOWBACKPAINORANDSCIATICA	IVDD	CD39+ CD4+ %CD4+	Weighted median	25	-0.157586	0.0790325	0.0461588	-0.31249	-0.00268226	0.854203	0.731623	0.997321
GCST90001659	finngen_R5_M13_LOWBACKPAINORANDSCIATICA	IVDD	CD39+ CD4+ %CD4+	Inverse variance weighted	25	-0.155923	0.0534693	0.00354418	-0.260723	-0.0511229	0.855625	0.770495	0.950162
GCST90001659	finngen_R5_M13_LOWBACKPAINORANDSCIATICA	IVDD	CD39+ CD4+ %CD4+	Simple mode	25	-0.138842	0.139082	0.328104	-0.411442	0.133758	0.870365	0.662694	1.14312
GCST90001659	finngen_R5_M13_LOWBACKPAINORANDSCIATICA	IVDD	CD39+ CD4+ %CD4+	Weighted mode	25	-0.157893	0.0669748	0.026891	-0.289163	-0.026622	0.853942	0.74889	0.973729
GCST90001672	finngen_R5_M13_LOWBACKPAINORANDSCIATICA	IVDD	CD39+ CD8br AC	MR Egger	23	-0.104168	0.0991362	0.305312	-0.298475	0.0901389	0.901074	0.741949	1.09433
GCST90001672	finngen_R5_M13_LOWBACKPAINORANDSCIATICA	IVDD	CD39+ CD8br AC	Weighted median	23	-0.149433	0.102205	0.143719	-0.349755	0.0508899	0.861197	0.704861	1.05221
GCST90001672	finngen_R5_M13_LOWBACKPAINORANDSCIATICA	IVDD	CD39+ CD8br AC	Inverse variance weighted	23	-0.165238	0.0699976	0.0182442	-0.302433	-0.0280427	0.847692	0.739018	0.972347
GCST90001672	finngen_R5_M13_LOWBACKPAINORANDSCIATICA	IVDD	CD39+ CD8br AC	Simple mode	23	0.0408598	0.144103	0.779409	-0.241582	0.323301	1.04171	0.785385	1.38168
GCST90001672	finngen_R5_M13_LOWBACKPAINORANDSCIATICA	IVDD	CD39+ CD8br AC	Weighted mode	23	-0.143515	0.102435	0.175153	-0.344289	0.0572581	0.866307	0.708724	1.05893
GCST90001810	finngen_R5_M13_LOWBACKPAINORANDSCIATICA	IVDD	CD38 on CD3- CD19-	MR Egger	17	-0.00307814	0.165773	0.98543	-0.327993	0.321837	0.996927	0.720368	1.37966
GCST90001810	finngen_R5_M13_LOWBACKPAINORANDSCIATICA	IVDD	CD38 on CD3- CD19-	Weighted median	17	-0.213442	0.120201	0.0757824	-0.449036	0.0221531	0.807799	0.638243	1.0224
GCST90001810	finngen_R5_M13_LOWBACKPAINORANDSCIATICA	IVDD	CD38 on CD3- CD19-	Inverse variance weighted	17	-0.240967	0.0980378	0.0139751	-0.433121	-0.0488133	0.785867	0.648482	0.952359
GCST90001810	finngen_R5_M13_LOWBACKPAINORANDSCIATICA	IVDD	CD38 on CD3- CD19-	Simple mode	17	-0.132034	0.216477	0.55048	-0.55633	0.292262	0.876311	0.573309	1.33945
GCST90001810	finngen_R5_M13_LOWBACKPAINORANDSCIATICA	IVDD	CD38 on CD3- CD19-	Weighted mode	17	-0.0230361	0.130818	0.86243	-0.279439	0.233366	0.977227	0.756208	1.26284
GCST90001819	finngen_R5_M13_LOWBACKPAINORANDSCIATICA	IVDD	CD38 on transitional	MR Egger	22	-0.102244	0.114805	0.383739	-0.327262	0.122774	0.902809	0.720895	1.13063
GCST90001819	finngen_R5_M13_LOWBACKPAINORANDSCIATICA	IVDD	CD38 on transitional	Weighted median	22	-0.0934767	0.113962	0.412077	-0.316843	0.129889	0.910759	0.728445	1.1387
GCST90001819	finngen_R5_M13_LOWBACKPAINORANDSCIATICA	IVDD	CD38 on transitional	Inverse variance weighted	22	-0.20724	0.0765793	0.00680566	-0.357335	-0.0571441	0.812825	0.699538	0.944458
GCST90001819	finngen_R5_M13_LOWBACKPAINORANDSCIATICA	IVDD	CD38 on transitional	Simple mode	22	-0.271906	0.232507	0.255325	-0.727621	0.183808	0.761926	0.483057	1.20179
GCST90001819	finngen_R5_M13_LOWBACKPAINORANDSCIATICA	IVDD	CD38 on transitional	Weighted mode	22	-0.102863	0.108843	0.355378	-0.316195	0.110469	0.902251	0.728918	1.1168
GCST90001820	finngen_R5_M13_LOWBACKPAINORANDSCIATICA	IVDD	IgD on IgD+ CD24+	MR Egger	26	0.290304	0.0982595	0.00691309	0.0977152	0.482893	1.33683	1.10265	1.62076
GCST90001820	finngen_R5_M13_LOWBACKPAINORANDSCIATICA	IVDD	IgD on IgD+ CD24+	Weighted median	26	0.209065	0.0911214	0.0217701	0.030467	0.387663	1.23252	1.03094	1.47353
GCST90001820	finngen_R5_M13_LOWBACKPAINORANDSCIATICA	IVDD	IgD on IgD+ CD24+	Inverse variance weighted	26	0.130894	0.061083	0.0321228	0.0111709	0.250616	1.13985	1.01123	1.28482
GCST90001820	finngen_R5_M13_LOWBACKPAINORANDSCIATICA	IVDD	IgD on IgD+ CD24+	Simple mode	26	-0.0252413	0.150447	0.86811	-0.320117	0.269635	0.975075	0.726064	1.30949
GCST90001820	finngen_R5_M13_LOWBACKPAINORANDSCIATICA	IVDD	IgD on IgD+ CD24+	Weighted mode	26	0.233965	0.086244	0.0118993	0.0649268	0.403003	1.2636	1.06708	1.49631
GCST90001821	finngen_R5_M13_LOWBACKPAINORANDSCIATICA	IVDD	IgD on IgD+ CD24-	MR Egger	29	0.321901	0.113057	0.00832637	0.100309	0.543492	1.37975	1.10551	1.72201
GCST90001821	finngen_R5_M13_LOWBACKPAINORANDSCIATICA	IVDD	IgD on IgD+ CD24-	Weighted median	29	0.297442	0.0961196	0.00197146	0.109048	0.485836	1.34641	1.11522	1.62553
GCST90001821	finngen_R5_M13_LOWBACKPAINORANDSCIATICA	IVDD	IgD on IgD+ CD24-	Inverse variance weighted	29	0.193187	0.0662907	0.00356564	0.0632568	0.323116	1.21311	1.0653	1.38143
GCST90001821	finngen_R5_M13_LOWBACKPAINORANDSCIATICA	IVDD	IgD on IgD+ CD24-	Simple mode	29	0.145293	0.19709	0.467138	-0.241002	0.531589	1.15638	0.78584	1.70163
GCST90001821	finngen_R5_M13_LOWBACKPAINORANDSCIATICA	IVDD	IgD on IgD+ CD24-	Weighted mode	29	0.285771	0.088942	0.00329482	0.111445	0.460097	1.33079	1.11789	1.58423
GCST90001824	finngen_R5_M13_LOWBACKPAINORANDSCIATICA	IVDD	IgD on IgD+ CD38br	MR Egger	24	0.25078	0.123099	0.0538341	0.00950672	0.492053	1.28503	1.00955	1.63567
GCST90001824	finngen_R5_M13_LOWBACKPAINORANDSCIATICA	IVDD	IgD on IgD+ CD38br	Weighted median	24	0.274948	0.0895466	0.00213741	0.0994365	0.450459	1.31646	1.10455	1.56903
GCST90001824	finngen_R5_M13_LOWBACKPAINORANDSCIATICA	IVDD	IgD on IgD+ CD38br	Inverse variance weighted	24	0.179437	0.0688855	0.00919119	0.0444215	0.314453	1.19654	1.04542	1.36951
GCST90001824	finngen_R5_M13_LOWBACKPAINORANDSCIATICA	IVDD	IgD on IgD+ CD38br	Simple mode	24	0.399663	0.219866	0.0821526	-0.0312752	0.830601	1.49132	0.969209	2.2947
GCST90001824	finngen_R5_M13_LOWBACKPAINORANDSCIATICA	IVDD	IgD on IgD+ CD38br	Weighted mode	24	0.291953	0.0948868	0.00533176	0.105975	0.477932	1.33904	1.11179	1.61274
GCST90001825	finngen_R5_M13_LOWBACKPAINORANDSCIATICA	IVDD	IgD on IgD+ CD38dim	MR Egger	22	0.178317	0.096065	0.078218	-0.0099702	0.366605	1.1952	0.990079	1.44283
GCST90001825	finngen_R5_M13_LOWBACKPAINORANDSCIATICA	IVDD	IgD on IgD+ CD38dim	Weighted median	22	0.0926367	0.089024	0.29807	-0.0818505	0.267124	1.09706	0.92141	1.3062
GCST90001825	finngen_R5_M13_LOWBACKPAINORANDSCIATICA	IVDD	IgD on IgD+ CD38dim	Inverse variance weighted	22	0.15383	0.0622676	0.0134936	0.0317857	0.275875	1.16629	1.0323	1.31768
GCST90001825	finngen_R5_M13_LOWBACKPAINORANDSCIATICA	IVDD	IgD on IgD+ CD38dim	Simple mode	22	0.350984	0.160039	0.0396983	0.0373072	0.664661	1.42046	1.03801	1.94383
GCST90001825	finngen_R5_M13_LOWBACKPAINORANDSCIATICA	IVDD	IgD on IgD+ CD38dim	Weighted mode	22	0.202192	0.0772672	0.0161117	0.0507488	0.353636	1.22408	1.05206	1.42424
GCST90001853	finngen_R5_M13_LOWBACKPAINORANDSCIATICA	IVDD	CD3 on activated Treg	MR Egger	19	-0.131221	0.113342	0.262976	-0.35337	0.090929	0.877024	0.702317	1.09519
GCST90001853	finngen_R5_M13_LOWBACKPAINORANDSCIATICA	IVDD	CD3 on activated Treg	Weighted median	19	-0.178235	0.0999606	0.0745778	-0.374158	0.0176878	0.836746	0.687868	1.01785
GCST90001853	finngen_R5_M13_LOWBACKPAINORANDSCIATICA	IVDD	CD3 on activated Treg	Inverse variance weighted	19	-0.189283	0.0688002	0.00593776	-0.324131	-0.0544346	0.827552	0.723155	0.94702
GCST90001853	finngen_R5_M13_LOWBACKPAINORANDSCIATICA	IVDD	CD3 on activated Treg	Simple mode	19	-0.0965926	0.17684	0.591625	-0.443199	0.250014	0.907926	0.64198	1.28404
GCST90001853	finngen_R5_M13_LOWBACKPAINORANDSCIATICA	IVDD	CD3 on activated Treg	Weighted mode	19	-0.158242	0.0983196	0.124911	-0.350949	0.0344641	0.853643	0.70402	1.03506
GCST90001855	finngen_R5_M13_LOWBACKPAINORANDSCIATICA	IVDD	CD3 on secreting Treg	MR Egger	20	-0.200075	0.118945	0.109821	-0.433208	0.0330578	0.818669	0.648425	1.03361
GCST90001855	finngen_R5_M13_LOWBACKPAINORANDSCIATICA	IVDD	CD3 on secreting Treg	Weighted median	20	-0.15385	0.0985136	0.118356	-0.346937	0.0392368	0.857401	0.70685	1.04002
GCST90001855	finngen_R5_M13_LOWBACKPAINORANDSCIATICA	IVDD	CD3 on secreting Treg	Inverse variance weighted	20	-0.162889	0.0732758	0.0262186	-0.30651	-0.0192685	0.849685	0.736011	0.980916
GCST90001855	finngen_R5_M13_LOWBACKPAINORANDSCIATICA	IVDD	CD3 on secreting Treg	Simple mode	20	-0.138621	0.148182	0.361279	-0.429058	0.151815	0.870558	0.651122	1.16395
GCST90001855	finngen_R5_M13_LOWBACKPAINORANDSCIATICA	IVDD	CD3 on secreting Treg	Weighted mode	20	-0.138621	0.100773	0.184953	-0.336136	0.0588935	0.870558	0.714526	1.06066
GCST90001857	finngen_R5_M13_LOWBACKPAINORANDSCIATICA	IVDD	CD3 on activated & secreting Treg	MR Egger	20	-0.176946	0.105129	0.109613	-0.382999	0.0291069	0.837825	0.681814	1.02953
GCST90001857	finngen_R5_M13_LOWBACKPAINORANDSCIATICA	IVDD	CD3 on activated & secreting Treg	Weighted median	20	-0.169671	0.0892701	0.0573482	-0.34464	0.00529841	0.843942	0.708475	1.00531
GCST90001857	finngen_R5_M13_LOWBACKPAINORANDSCIATICA	IVDD	CD3 on activated & secreting Treg	Inverse variance weighted	20	-0.146785	0.0667811	0.0279485	-0.277676	-0.0158945	0.863479	0.757542	0.984231
GCST90001857	finngen_R5_M13_LOWBACKPAINORANDSCIATICA	IVDD	CD3 on activated & secreting Treg	Simple mode	20	-0.140873	0.144672	0.342421	-0.424431	0.142685	0.8686	0.654142	1.15337
GCST90001857	finngen_R5_M13_LOWBACKPAINORANDSCIATICA	IVDD	CD3 on activated & secreting Treg	Weighted mode	20	-0.153891	0.0996425	0.138977	-0.34919	0.0414083	0.857365	0.705259	1.04228
GCST90001860	finngen_R5_M13_LOWBACKPAINORANDSCIATICA	IVDD	CD3 on CD39+ CD4+	MR Egger	27	-0.18347	0.094554	0.0636927	-0.368796	0.00185585	0.832377	0.691567	1.00186
GCST90001860	finngen_R5_M13_LOWBACKPAINORANDSCIATICA	IVDD	CD3 on CD39+ CD4+	Weighted median	27	-0.118998	0.0847169	0.160123	-0.285043	0.047047	0.887809	0.751982	1.04817
GCST90001860	finngen_R5_M13_LOWBACKPAINORANDSCIATICA	IVDD	CD3 on CD39+ CD4+	Inverse variance weighted	27	-0.128214	0.0579843	0.0270225	-0.241864	-0.0145652	0.879665	0.785163	0.98554
GCST90001860	finngen_R5_M13_LOWBACKPAINORANDSCIATICA	IVDD	CD3 on CD39+ CD4+	Simple mode	27	-0.0463688	0.131125	0.726473	-0.303374	0.210636	0.95469	0.738323	1.23446
GCST90001860	finngen_R5_M13_LOWBACKPAINORANDSCIATICA	IVDD	CD3 on CD39+ CD4+	Weighted mode	27	-0.112308	0.0847861	0.196827	-0.278489	0.0538723	0.893769	0.756927	1.05535
GCST90001862	finngen_R5_M13_LOWBACKPAINORANDSCIATICA	IVDD	CD3 on CD28+ DN (CD4-CD8-)	MR Egger	14	0.249601	0.113105	0.047552	0.0279154	0.471286	1.28351	1.02831	1.60205
GCST90001862	finngen_R5_M13_LOWBACKPAINORANDSCIATICA	IVDD	CD3 on CD28+ DN (CD4-CD8-)	Weighted median	14	0.258953	0.11187	0.0206254	0.0396882	0.478218	1.29557	1.04049	1.6132
GCST90001862	finngen_R5_M13_LOWBACKPAINORANDSCIATICA	IVDD	CD3 on CD28+ DN (CD4-CD8-)	Inverse variance weighted	14	0.199347	0.0824144	0.0155702	0.0378149	0.360879	1.22061	1.03854	1.43459
GCST90001862	finngen_R5_M13_LOWBACKPAINORANDSCIATICA	IVDD	CD3 on CD28+ DN (CD4-CD8-)	Simple mode	14	0.354904	0.188516	0.0823233	-0.0145879	0.724395	1.42604	0.985518	2.06348
GCST90001862	finngen_R5_M13_LOWBACKPAINORANDSCIATICA	IVDD	CD3 on CD28+ DN (CD4-CD8-)	Weighted mode	14	0.252222	0.123121	0.0612538	0.0109054	0.493539	1.28688	1.01097	1.6381
GCST90001882	finngen_R5_M13_LOWBACKPAINORANDSCIATICA	IVDD	HVEM on CM CD8br	MR Egger	17	0.177849	0.103527	0.10638	-0.025063	0.380762	1.19465	0.975248	1.4634
GCST90001882	finngen_R5_M13_LOWBACKPAINORANDSCIATICA	IVDD	HVEM on CM CD8br	Weighted median	17	0.14393	0.0895303	0.10792	-0.0315494	0.319409	1.1548	0.968943	1.37631
GCST90001882	finngen_R5_M13_LOWBACKPAINORANDSCIATICA	IVDD	HVEM on CM CD8br	Inverse variance weighted	17	0.120419	0.058654	0.040069	0.00545696	0.235381	1.12797	1.00547	1.26539
GCST90001882	finngen_R5_M13_LOWBACKPAINORANDSCIATICA	IVDD	HVEM on CM CD8br	Simple mode	17	0.0234194	0.149839	0.877754	-0.270265	0.317104	1.0237	0.763177	1.37315
GCST90001882	finngen_R5_M13_LOWBACKPAINORANDSCIATICA	IVDD	HVEM on CM CD8br	Weighted mode	17	0.137221	0.0803937	0.107176	-0.0203505	0.294793	1.14708	0.979855	1.34285
GCST90001932	finngen_R5_M13_LOWBACKPAINORANDSCIATICA	IVDD	CD127 on CD45RA+ CD4+	MR Egger	19	0.118892	0.21035	0.579313	-0.293394	0.531178	1.12625	0.745728	1.70094
GCST90001932	finngen_R5_M13_LOWBACKPAINORANDSCIATICA	IVDD	CD127 on CD45RA+ CD4+	Weighted median	19	0.163241	0.137792	0.236139	-0.106831	0.433314	1.17732	0.898677	1.54236
GCST90001932	finngen_R5_M13_LOWBACKPAINORANDSCIATICA	IVDD	CD127 on CD45RA+ CD4+	Inverse variance weighted	19	0.231449	0.102818	0.0243828	0.0299246	0.432973	1.26042	1.03038	1.54183
GCST90001932	finngen_R5_M13_LOWBACKPAINORANDSCIATICA	IVDD	CD127 on CD45RA+ CD4+	Simple mode	19	0.402802	0.245682	0.118462	-0.0787336	0.884338	1.49601	0.924286	2.42138
GCST90001932	finngen_R5_M13_LOWBACKPAINORANDSCIATICA	IVDD	CD127 on CD45RA+ CD4+	Weighted mode	19	0.173091	0.161396	0.297681	-0.143245	0.489426	1.18897	0.866542	1.63138
GCST90001938	finngen_R5_M13_LOWBACKPAINORANDSCIATICA	IVDD	CD25 on CD39+ resting Treg	MR Egger	15	-0.38175	0.243916	0.14157	-0.859825	0.0963245	0.682666	0.423236	1.10112
GCST90001938	finngen_R5_M13_LOWBACKPAINORANDSCIATICA	IVDD	CD25 on CD39+ resting Treg	Weighted median	15	-0.431368	0.185211	0.0198554	-0.794381	-0.0683555	0.64962	0.451861	0.933928
GCST90001938	finngen_R5_M13_LOWBACKPAINORANDSCIATICA	IVDD	CD25 on CD39+ resting Treg	Inverse variance weighted	15	-0.382365	0.1326	0.00393166	-0.642262	-0.122469	0.682246	0.526101	0.884734
GCST90001938	finngen_R5_M13_LOWBACKPAINORANDSCIATICA	IVDD	CD25 on CD39+ resting Treg	Simple mode	15	-0.667962	0.321317	0.0565003	-1.29774	-0.0381813	0.512753	0.273148	0.962538
GCST90001938	finngen_R5_M13_LOWBACKPAINORANDSCIATICA	IVDD	CD25 on CD39+ resting Treg	Weighted mode	15	-0.639242	0.280462	0.0388478	-1.18895	-0.089536	0.527692	0.304541	0.914355
GCST90001943	finngen_R5_M13_LOWBACKPAINORANDSCIATICA	IVDD	CD25 on activated & secreting Treg	MR Egger	20	-0.161688	0.0496649	0.00439115	-0.259031	-0.0643445	0.850707	0.771799	0.937682
GCST90001943	finngen_R5_M13_LOWBACKPAINORANDSCIATICA	IVDD	CD25 on activated & secreting Treg	Weighted median	20	-0.172122	0.0664269	0.0095654	-0.302319	-0.0419258	0.841876	0.739102	0.958941
GCST90001943	finngen_R5_M13_LOWBACKPAINORANDSCIATICA	IVDD	CD25 on activated & secreting Treg	Inverse variance weighted	20	-0.146669	0.0422242	0.000513559	-0.229429	-0.0639099	0.863579	0.794987	0.93809
GCST90001943	finngen_R5_M13_LOWBACKPAINORANDSCIATICA	IVDD	CD25 on activated & secreting Treg	Simple mode	20	-0.191119	0.117272	0.11963	-0.420971	0.0387335	0.826034	0.656409	1.03949
GCST90001943	finngen_R5_M13_LOWBACKPAINORANDSCIATICA	IVDD	CD25 on activated & secreting Treg	Weighted mode	20	-0.160515	0.0550151	0.00882903	-0.268345	-0.0526859	0.851705	0.764644	0.948678
GCST90001969	finngen_R5_M13_LOWBACKPAINORANDSCIATICA	IVDD	FSC-A on NK	MR Egger	18	0.221366	0.134605	0.119561	-0.0424592	0.485191	1.24778	0.95843	1.62448
GCST90001969	finngen_R5_M13_LOWBACKPAINORANDSCIATICA	IVDD	FSC-A on NK	Weighted median	18	0.178503	0.133873	0.182406	-0.0838868	0.440894	1.19543	0.919535	1.5541
GCST90001969	finngen_R5_M13_LOWBACKPAINORANDSCIATICA	IVDD	FSC-A on NK	Inverse variance weighted	18	0.175065	0.0871102	0.0444639	0.00432859	0.345801	1.19132	1.00434	1.41312
GCST90001969	finngen_R5_M13_LOWBACKPAINORANDSCIATICA	IVDD	FSC-A on NK	Simple mode	18	0.144173	0.196823	0.473844	-0.241601	0.529946	1.15508	0.78537	1.69884
GCST90001969	finngen_R5_M13_LOWBACKPAINORANDSCIATICA	IVDD	FSC-A on NK	Weighted mode	18	0.188841	0.120926	0.136799	-0.0481741	0.425856	1.20785	0.952968	1.5309
GCST90001971	finngen_R5_M13_LOWBACKPAINORANDSCIATICA	IVDD	FSC-A on lymphocyte	MR Egger	16	-0.199969	0.0837329	0.0315752	-0.364086	-0.035853	0.818756	0.694831	0.964782
GCST90001971	finngen_R5_M13_LOWBACKPAINORANDSCIATICA	IVDD	FSC-A on lymphocyte	Weighted median	16	-0.251384	0.101082	0.0128852	-0.449506	-0.0532629	0.777723	0.637943	0.948131
GCST90001971	finngen_R5_M13_LOWBACKPAINORANDSCIATICA	IVDD	FSC-A on lymphocyte	Inverse variance weighted	16	-0.221648	0.0711393	0.00183514	-0.361081	-0.0822151	0.801197	0.696922	0.921074
GCST90001971	finngen_R5_M13_LOWBACKPAINORANDSCIATICA	IVDD	FSC-A on lymphocyte	Simple mode	16	-0.184167	0.205705	0.38477	-0.587348	0.219014	0.831797	0.555799	1.24485
GCST90001971	finngen_R5_M13_LOWBACKPAINORANDSCIATICA	IVDD	FSC-A on lymphocyte	Weighted mode	16	-0.227156	0.0833244	0.015617	-0.390471	-0.0638398	0.796797	0.676738	0.938155
GCST90001972	finngen_R5_M13_LOWBACKPAINORANDSCIATICA	IVDD	FSC-A on T cell	MR Egger	21	-0.118463	0.0689451	0.102011	-0.253595	0.0166697	0.888285	0.776006	1.01681
GCST90001972	finngen_R5_M13_LOWBACKPAINORANDSCIATICA	IVDD	FSC-A on T cell	Weighted median	21	-0.171434	0.091579	0.0612103	-0.350928	0.00806141	0.842456	0.704034	1.00809
GCST90001972	finngen_R5_M13_LOWBACKPAINORANDSCIATICA	IVDD	FSC-A on T cell	Inverse variance weighted	21	-0.119128	0.0550063	0.0303326	-0.226941	-0.0113159	0.887694	0.796968	0.988748
GCST90001972	finngen_R5_M13_LOWBACKPAINORANDSCIATICA	IVDD	FSC-A on T cell	Simple mode	21	-0.104281	0.154086	0.506301	-0.406289	0.197726	0.900972	0.666118	1.21863
GCST90001972	finngen_R5_M13_LOWBACKPAINORANDSCIATICA	IVDD	FSC-A on T cell	Weighted mode	21	-0.176405	0.0814702	0.0426322	-0.336087	-0.0167237	0.838278	0.714561	0.983415
GCST90002014	finngen_R5_M13_LOWBACKPAINORANDSCIATICA	IVDD	CCR2 on CD62L+ myeloid DC	MR Egger	14	0.204422	0.22497	0.381415	-0.236519	0.645364	1.22682	0.789371	1.90668
GCST90002014	finngen_R5_M13_LOWBACKPAINORANDSCIATICA	IVDD	CCR2 on CD62L+ myeloid DC	Weighted median	14	0.227794	0.135524	0.0927926	-0.0378318	0.493421	1.25583	0.962875	1.63791
GCST90002014	finngen_R5_M13_LOWBACKPAINORANDSCIATICA	IVDD	CCR2 on CD62L+ myeloid DC	Inverse variance weighted	14	0.232764	0.103993	0.0252033	0.0289384	0.43659	1.26208	1.02936	1.54742
GCST90002014	finngen_R5_M13_LOWBACKPAINORANDSCIATICA	IVDD	CCR2 on CD62L+ myeloid DC	Simple mode	14	0.266992	0.198145	0.200851	-0.121373	0.655357	1.30603	0.885703	1.92583
GCST90002014	finngen_R5_M13_LOWBACKPAINORANDSCIATICA	IVDD	CCR2 on CD62L+ myeloid DC	Weighted mode	14	0.266992	0.146924	0.0923003	-0.0209801	0.554963	1.30603	0.979238	1.74188
GCST90002030	finngen_R5_M13_LOWBACKPAINORANDSCIATICA	IVDD	CD39 on CD39+ activated Treg	MR Egger	22	-0.250684	0.174173	0.16554	-0.592063	0.0906955	0.778269	0.553185	1.09494
GCST90002030	finngen_R5_M13_LOWBACKPAINORANDSCIATICA	IVDD	CD39 on CD39+ activated Treg	Weighted median	22	-0.187225	0.11104	0.0917762	-0.404863	0.0304136	0.829258	0.667068	1.03088
GCST90002030	finngen_R5_M13_LOWBACKPAINORANDSCIATICA	IVDD	CD39 on CD39+ activated Treg	Inverse variance weighted	22	-0.185554	0.0780928	0.0174981	-0.338616	-0.0324922	0.830644	0.712756	0.96803
GCST90002030	finngen_R5_M13_LOWBACKPAINORANDSCIATICA	IVDD	CD39 on CD39+ activated Treg	Simple mode	22	-0.194336	0.161548	0.24238	-0.510971	0.122299	0.823381	0.599913	1.13009
GCST90002030	finngen_R5_M13_LOWBACKPAINORANDSCIATICA	IVDD	CD39 on CD39+ activated Treg	Weighted mode	22	-0.162503	0.117394	0.180818	-0.392595	0.06759	0.850014	0.675302	1.06993
GCST90002039	finngen_R5_M13_LOWBACKPAINORANDSCIATICA	IVDD	CD80 on monocyte	MR Egger	20	0.425617	0.128244	0.00381932	0.174259	0.676975	1.53053	1.19036	1.96792
GCST90002039	finngen_R5_M13_LOWBACKPAINORANDSCIATICA	IVDD	CD80 on monocyte	Weighted median	20	0.260343	0.12195	0.0327741	0.0213217	0.499365	1.29738	1.02155	1.64767
GCST90002039	finngen_R5_M13_LOWBACKPAINORANDSCIATICA	IVDD	CD80 on monocyte	Inverse variance weighted	20	0.178832	0.084459	0.0342274	0.0132924	0.344372	1.19582	1.01338	1.4111
GCST90002039	finngen_R5_M13_LOWBACKPAINORANDSCIATICA	IVDD	CD80 on monocyte	Simple mode	20	0.198655	0.186781	0.300854	-0.167436	0.564745	1.21976	0.845831	1.759
GCST90002039	finngen_R5_M13_LOWBACKPAINORANDSCIATICA	IVDD	CD80 on monocyte	Weighted mode	20	0.304094	0.133603	0.0346037	0.0422317	0.565956	1.3554	1.04314	1.76113
GCST90002059	finngen_R5_M13_LOWBACKPAINORANDSCIATICA	IVDD	CD8 on NKT	MR Egger	17	-0.317672	0.160491	0.0664296	-0.632235	-0.00311017	0.727841	0.531403	0.996895
GCST90002059	finngen_R5_M13_LOWBACKPAINORANDSCIATICA	IVDD	CD8 on NKT	Weighted median	17	-0.205693	0.143531	0.151832	-0.487013	0.0756277	0.814083	0.614459	1.07856
GCST90002059	finngen_R5_M13_LOWBACKPAINORANDSCIATICA	IVDD	CD8 on NKT	Inverse variance weighted	17	-0.198967	0.0964044	0.0390293	-0.387919	-0.0100143	0.819577	0.678467	0.990036
GCST90002059	finngen_R5_M13_LOWBACKPAINORANDSCIATICA	IVDD	CD8 on NKT	Simple mode	17	0.160579	0.255684	0.538841	-0.340561	0.661719	1.17419	0.711371	1.93812
GCST90002059	finngen_R5_M13_LOWBACKPAINORANDSCIATICA	IVDD	CD8 on NKT	Weighted mode	17	-0.211465	0.14688	0.169228	-0.499349	0.0764198	0.809398	0.606926	1.07942
GCST90002061	finngen_R5_M13_LOWBACKPAINORANDSCIATICA	IVDD	CD4 on CD39+ CD4+	MR Egger	24	0.0342214	0.0248782	0.182803	-0.0145398	0.0829826	1.03481	0.985565	1.08652
GCST90002061	finngen_R5_M13_LOWBACKPAINORANDSCIATICA	IVDD	CD4 on CD39+ CD4+	Weighted median	24	0.0420004	0.0201169	0.036815	0.00257115	0.0814296	1.04289	1.00257	1.08484
GCST90002061	finngen_R5_M13_LOWBACKPAINORANDSCIATICA	IVDD	CD4 on CD39+ CD4+	Inverse variance weighted	24	0.0310567	0.013784	0.0242527	0.00404012	0.0580733	1.03154	1.00405	1.05979
GCST90002061	finngen_R5_M13_LOWBACKPAINORANDSCIATICA	IVDD	CD4 on CD39+ CD4+	Simple mode	24	0.0354731	0.0312421	0.267891	-0.0257615	0.0967078	1.03611	0.974568	1.10154
GCST90002061	finngen_R5_M13_LOWBACKPAINORANDSCIATICA	IVDD	CD4 on CD39+ CD4+	Weighted mode	24	0.0376882	0.021531	0.093376	-0.00451247	0.0798889	1.03841	0.995498	1.08317
